# Supplementary material for: Multichromic Behavior of Liquid Crystalline Composite Polymeric Films
Source: MDPI journal article supplement (doi:10.3390/cryst13050786), 2023-05-09
Supplement: s1 [file s1]

## Supporting Information

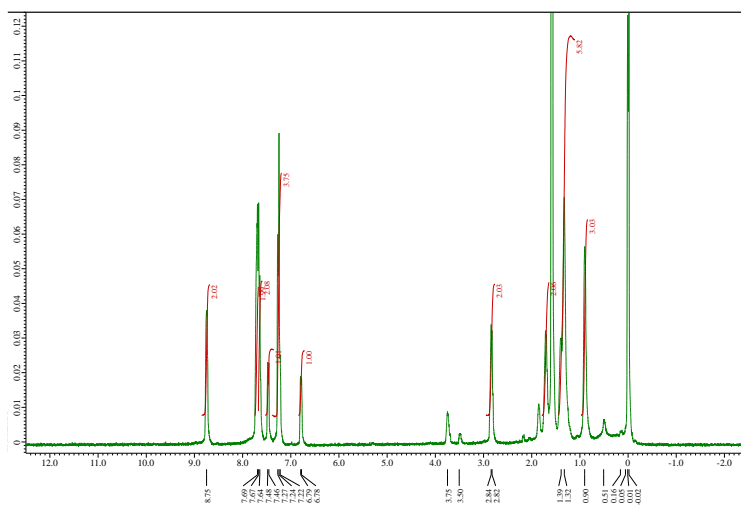

Figure S1. <sup>1</sup>H NMR Spectrum of the **1**.

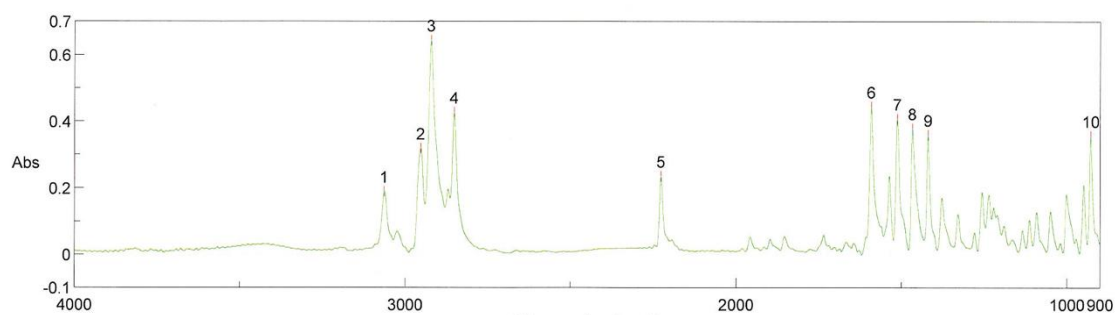

Figure S2. IR spectrum of **1**.

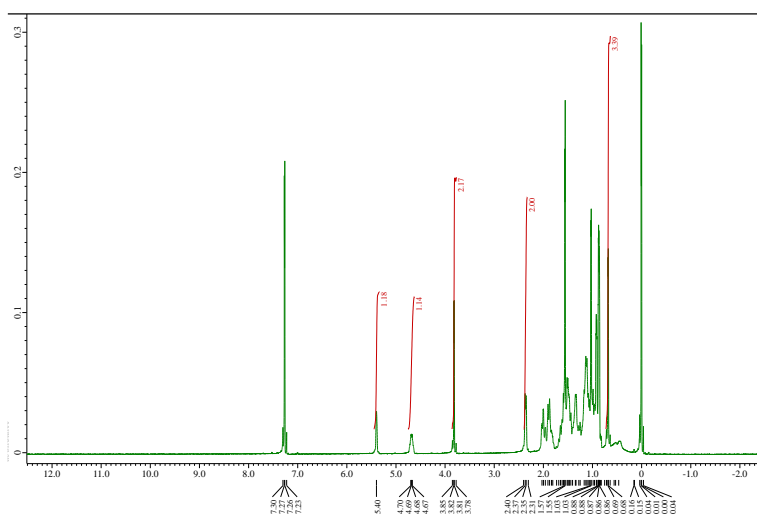

Figure S3. <sup>1</sup>H NMR Spectrum of the **2**.

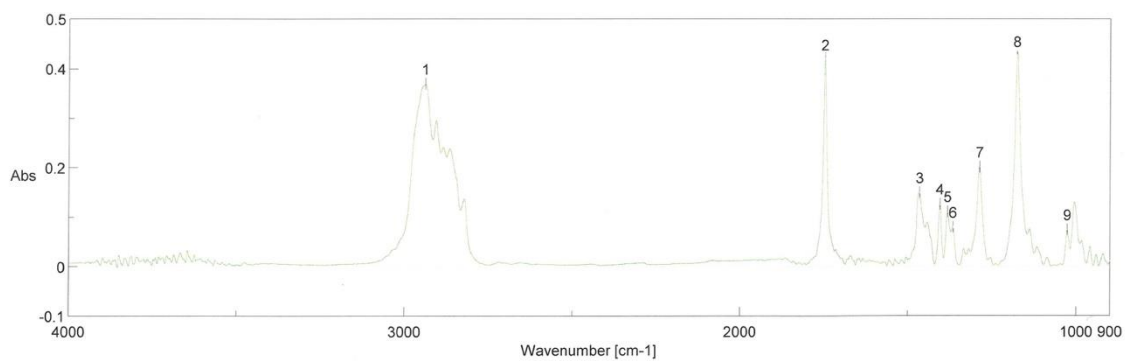

Figure S4. IR spectrum of **2**.

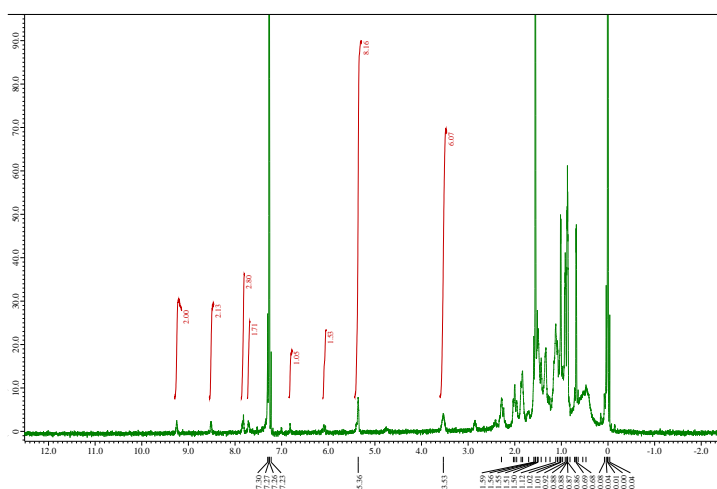

Figure S5. <sup>1</sup>H NMR Spectrum of the luminophore.

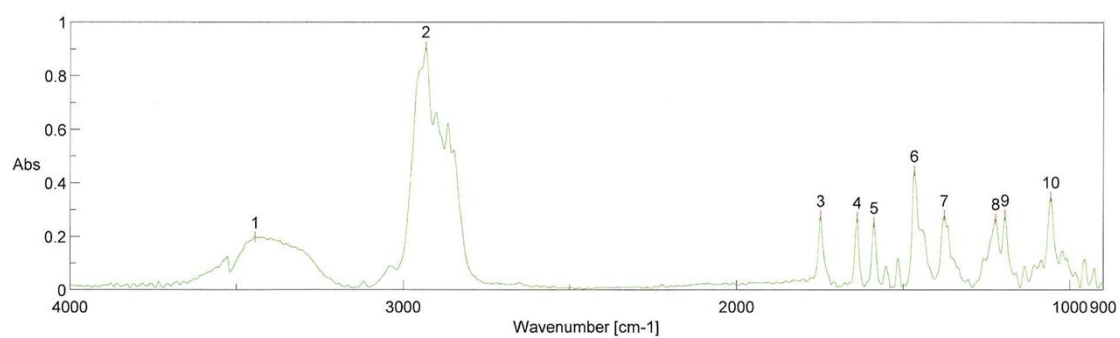

Figure S6. IR spectrum of the luminophore.

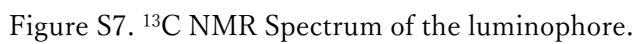

Figure S7.  $^{13}\text{C}$  NMR Spectrum of the luminophore.
